# Supplementary material for: Visible light triggered controlled formation of rapidly self-healing hydrogels based on thiol–disulfide exchange
Source: Royal Society of Chemistry journal article supplement (doi:10.1039/d1sm01698a), 2022-01-01
Supplement: d1sm01698a1.pdf [file d1sm01698a1.pdf]

## Supporting Information

# Visible light triggered controlled formation of rapidly self-Healing hydrogels based on thiol-disulfide exchange

*Linlin Wang,<sup>a,b</sup> Qingchen Cao,<sup>b,c</sup> Xing Wang,<sup>\*,b,c</sup> and Decheng Wu<sup>\*,b,d</sup>*

a) Key Laboratory of Special Functional Aggregated Materials (Shandong University), Ministry of Education; School of Chemistry and Chemical Engineering, Shandong University, Jinan, 250100 P. R. China

b) Beijing National Laboratory for Molecular Sciences, Institute of Chemistry, Chinese Academy of Sciences, Beijing 100190, China

c) University of Chinese Academy of Sciences, Beijing 100049, China

d) Department of Biomedical Engineering, Southern University of Science and Technology, Shenzhen, Guangdong 518055, China

\*Corresponding Author: E-mail: wangxing@iccas.ac.cn and dcwu@iccas.ac.cn

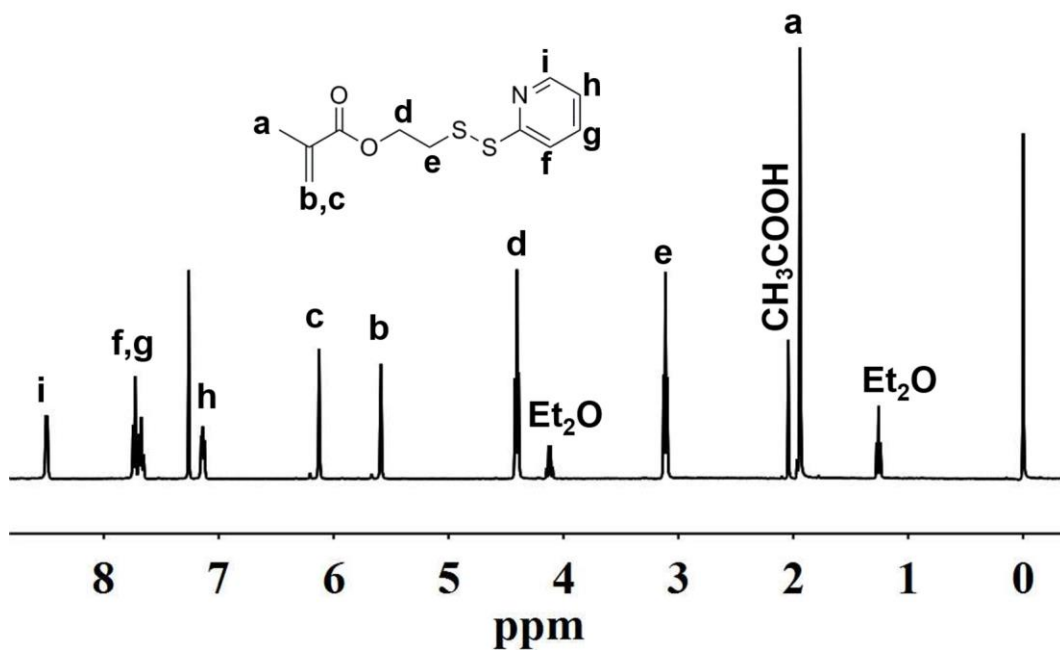

Fig. S1. <sup>1</sup>H NMR spectrum of EMA-SS-Py in CDCl<sub>3</sub>.

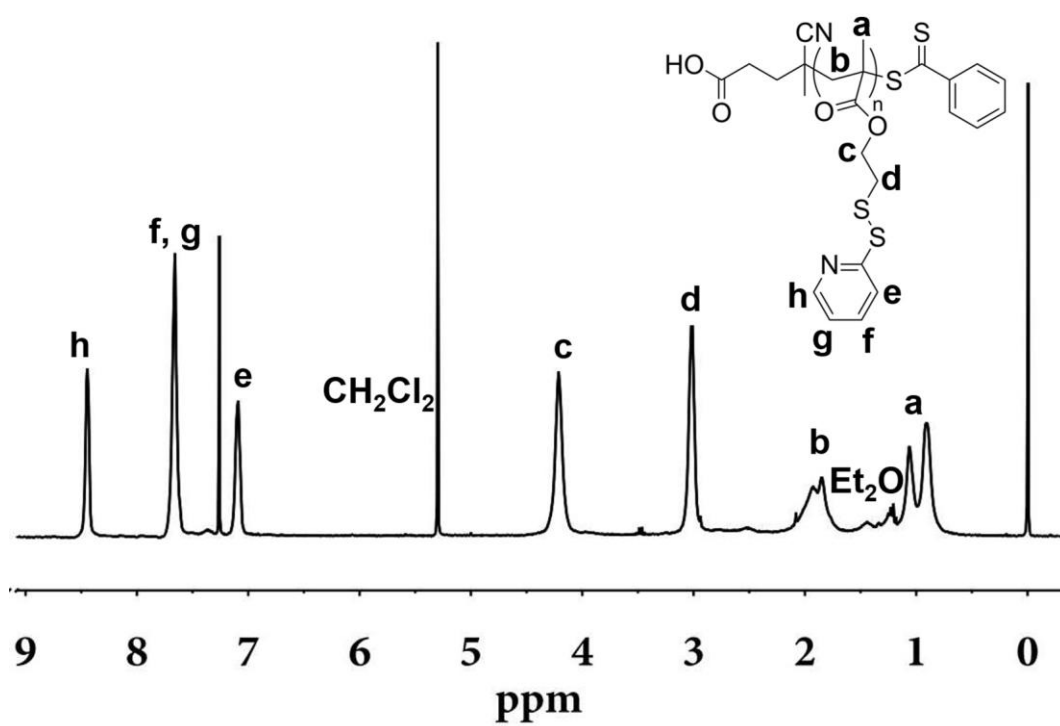

Fig. S2. <sup>1</sup>H NMR spectrum of P(EMA-SS-Py) in CDCl<sub>3</sub>.

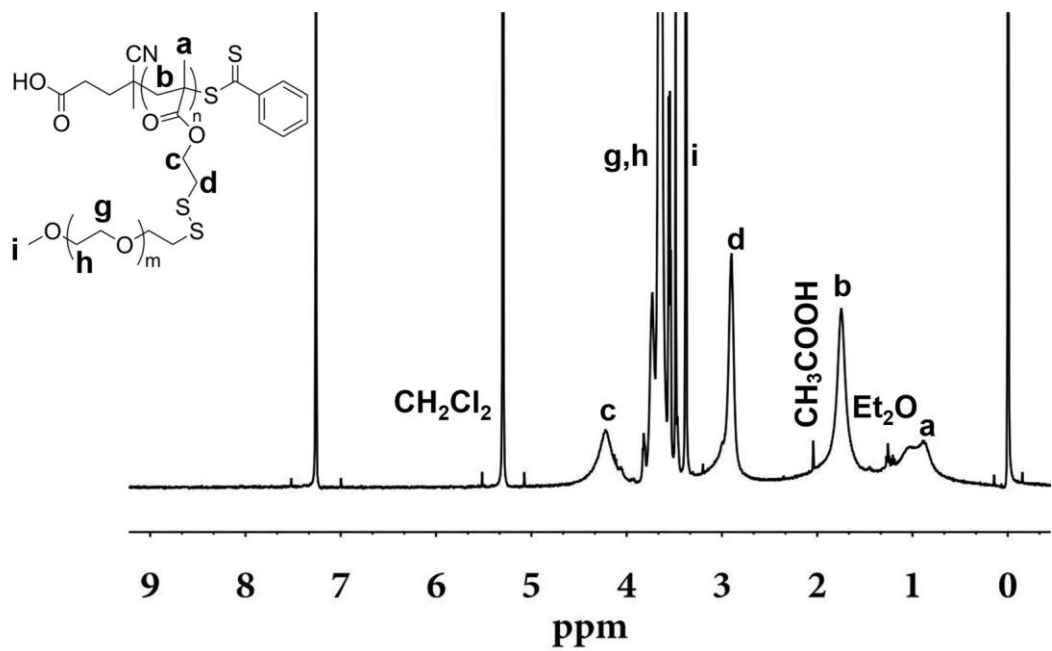

Fig. S3. <sup>1</sup>H NMR spectrum of P(EMA-SS-PEG) in CDCl<sub>3</sub>.

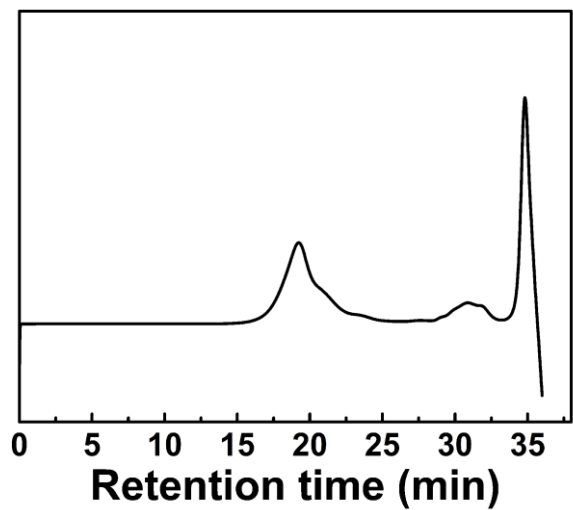

Fig. S4. GPC curve of P(EMA-SS-PEG).

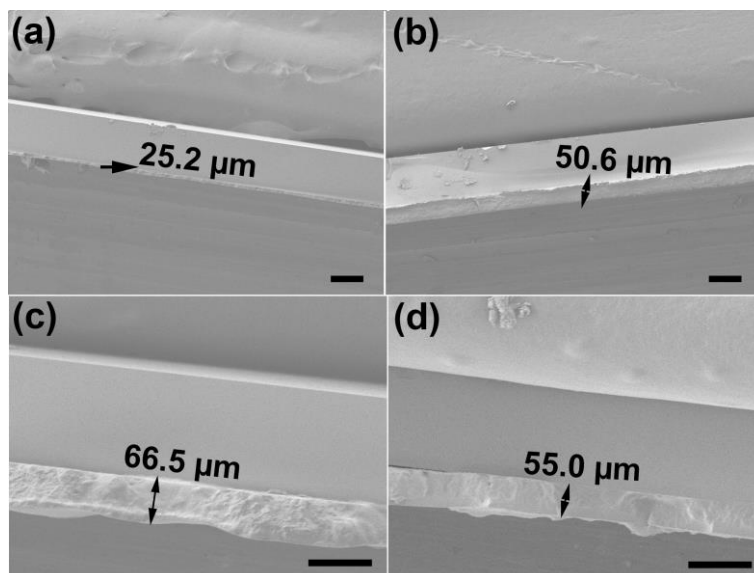

**Fig. S5.** SEM images of the coating thickness with different amount of hydrogel precursor solution and irradiation time: (a) 20  $\mu\text{L}$ +10 min, (b) 30  $\mu\text{L}$ +10 min, (c) 40  $\mu\text{L}$ +10 min, (d) 40  $\mu\text{L}$ +20 min. (Scale bar: 100  $\mu\text{m}$ ).

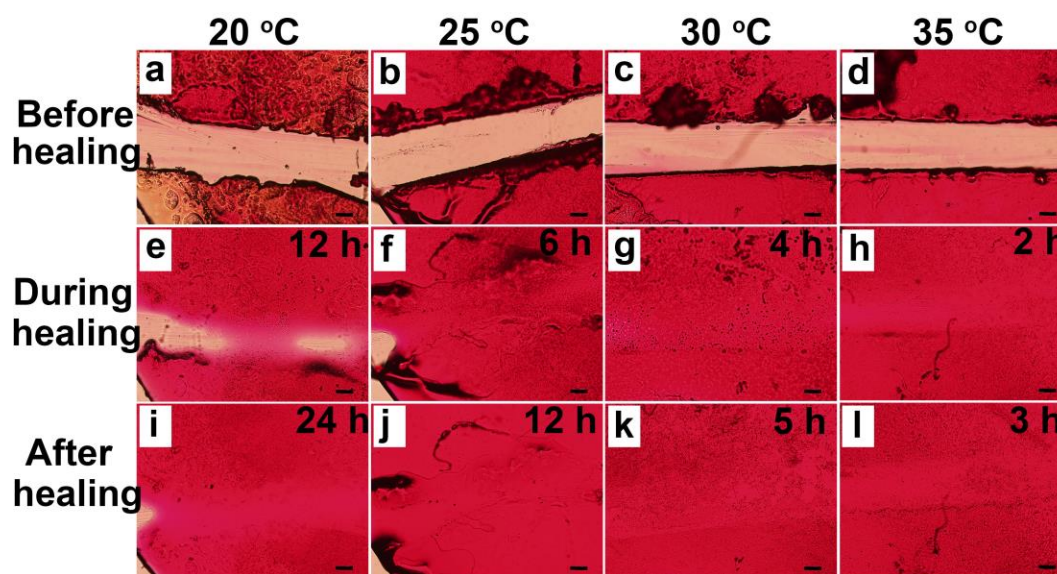

**Fig. S6.** Microscope images of self-healing for hydrogel coatings under different temperature conditions. (Scratch width: 270  $\mu\text{m}$ , humidity: 40% RH, scale bar: 100  $\mu\text{m}$ ).

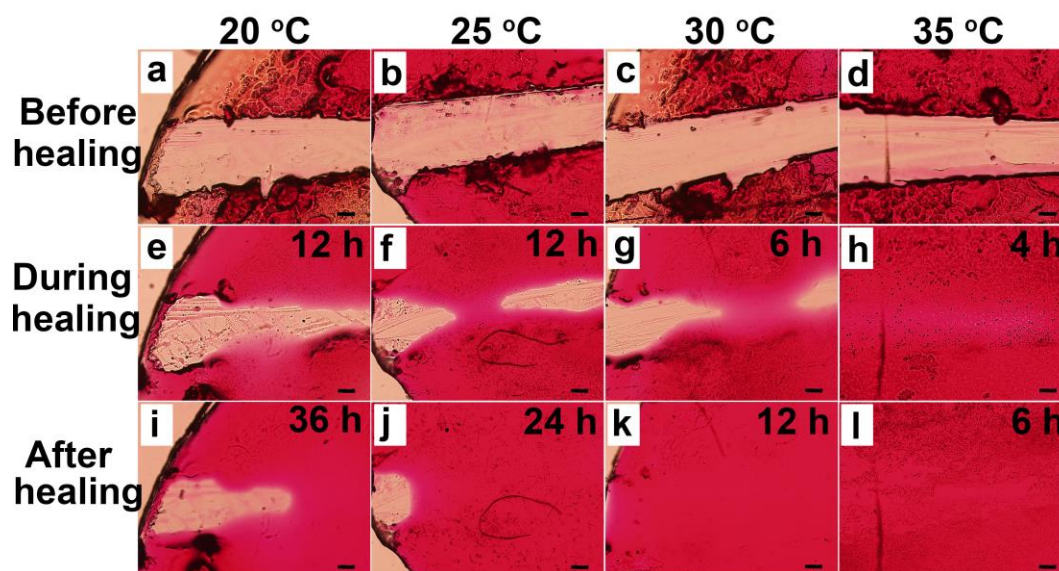

**Fig. S7.** Microscope images of self-healing for hydrogel coatings under different temperature conditions. (Scratch width: 360  $\mu\text{m}$ , humidity: 40% RH, scale bar: 100  $\mu\text{m}$ ).

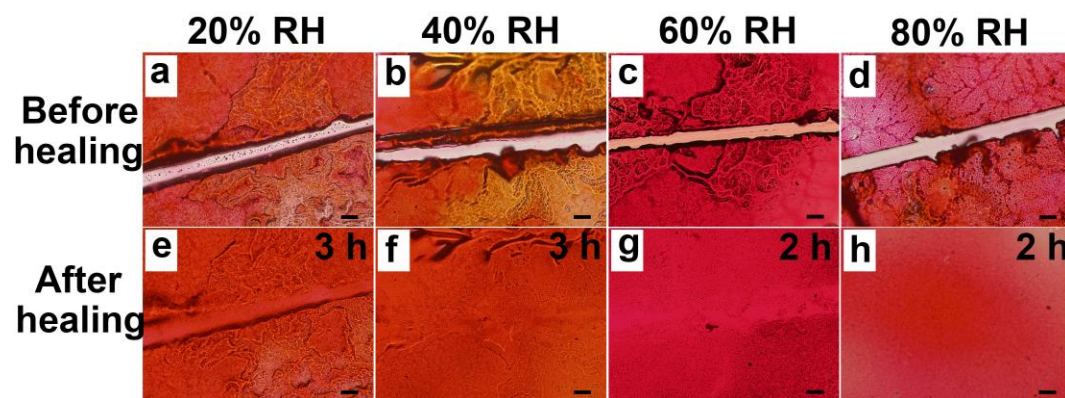

**Fig. S8.** Microscope images of self-healing for hydrogel coatings under different humidity conditions. (Scratch width:  $\sim 90 \mu\text{m}$ , temperature: 25 °C, scale bar: 100  $\mu\text{m}$ ).

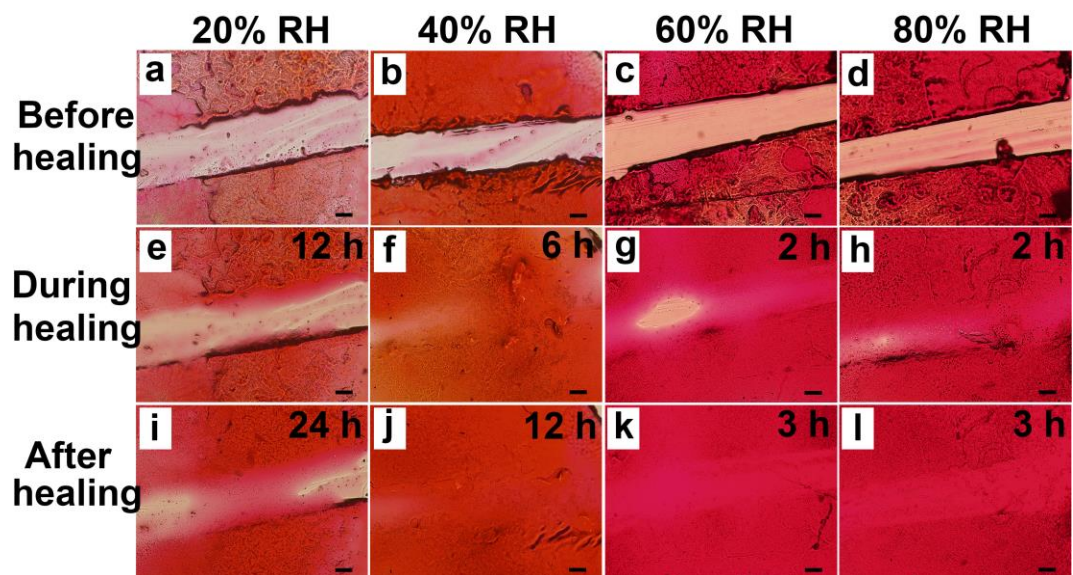

**Fig. S9.** Microscope images of self-healing for hydrogel coatings under different humidity conditions. (Scratch width: 270  $\mu\text{m}$ , temperature: 25  $^{\circ}\text{C}$ , scale bar: 100  $\mu\text{m}$ ).
